# Supplementary material for: Energy partitioning of pharmaceutical co-crystal structures
Source: Royal Society of Chemistry journal article supplement (doi:10.1039/d2ce00148a), 2023-01-01
Supplement: d2ce00148a1.pdf [file d2ce00148a1.pdf]

**Electronic supplementary information for the manuscript entitled**  
**“Energy partitioning of pharmaceutical co-crystal structures”**

Birger Dittrich,<sup>\*a,b</sup> Lauren Connor<sup>a</sup>, Dominic Werthmueller<sup>a</sup>, Nicole Sykes<sup>a</sup>, Anikó Udvarhelyi<sup>a</sup>

---

<sup>a</sup> *Novartis Campus, Novartis Pharma AG, Postfach, Basel CH-4002, Switzerland.*

<sup>b</sup> *Mathematisch Naturwiss. Fakultät, Chemie, Universität Zürich, Winterthurer Str. 190, CH-8057 Zürich, Switzerland.*

**Table 1** ONIOM partitioned molecular energies of piracetam in form II and III, compared to the energy of piracetam in two co-crystals (energy differences  $\Delta E$ ). Cofomer structure dimer energies are also provided. ONIOM MO/MO computations used APFD/6-31G(d,p): APFD/3-21G (or, in brackets B3LYP/6-31G(d,p)/B3LYP/3-21G) and include dispersion correction. We rounded the Hartree energy to four significant figures after the comma for this evaluation and converted Hartree in kcal/mol with a multiplier of 627.507404. wrt=with respect to

| REFCODE of structure                                                         | High-layer Energy in Hartrees | $\Delta E$ (kcal/mol) to lowest energy self-environment                        |
|------------------------------------------------------------------------------|-------------------------------|--------------------------------------------------------------------------------|
| Piracetam form II (BISMEV11, self-environment)                               | -494.2657 (-494.6835)         | +1.19 (+1.07) (wrt. form III)                                                  |
| Piracetam form III (BISMEV12, self-environment)                              | -494.2676 (-494.6852)         | $\pm 0.0$ ( $\pm 0.0$ )                                                        |
| Piracetam in piracetam monohydrate (YAKWAJ)                                  | -494.2683 (-494.6858)         | -0.44 (-0.38) (wrt. form III)                                                  |
| Piracetam in piracetam monohydrate, (YAKWAJ01, mol. 1)                       | -494.2684 (-494.6860)         | -0.50 (-0.50) (wrt. form III)                                                  |
| Water in myricetin hydrate, NIKLAX                                           | -76.3595 (-76.4200)           | $\pm 0.0$ (+0.063 wrt. water average for B3LYP, water result same for APFD)    |
| Myricetin without water (NIKLAX, monohyd. env., mol. 1)                      | -1178.5250 (-1179.4982)       | $\pm 0.0$ ( $\pm 0.0$ )                                                        |
| Myricetin hydrate (NIKLAX, monohydrate env. with water)                      | -1254.9002 (-1255.9331)       | -9.85 (-9.29)                                                                  |
| Water in piracetam monohydrate (YAKWAJ01, molecule 2)                        | -76.3595 (-76.4202)           | $\pm 0.0$ (-0.13) wrt. water in NIKLAX monohydrate, water result same for APFD |
| Piracetam hydrate, ASU energy for both molecules, YAKWAJ01                   | -570.6417 (-571.1199)         | -9.16 (-9.10) (here wrt. to sum of hydrate components)                         |
| Piracetam in co-crystal piracetam:myricetin, FIXROV01 molecule 2             | -494.2700 (-494.6875)         | -1.51 (-1.44) (wrt. form III)                                                  |
| Myricetin in co-crystal piracetam:myricetin FIXROV01 molecule 1              | -1178.5268 (-1179.4999)       | -1.13 (-1.07) (wrt. myricetin in monohydrate)                                  |
| Piracetam:myricetin co-crystal, ASU energy for both FIXROV molecules         | -1672.8215 (-1674.2119)       | -18.14 (-17.88) (wrt. sum of components of self-env.)                          |
| p-hydroxybenzoic acid (JOZZIH, self-env.) conformation 1                     | -495.6609 (-496.0808)         | +0.06 ( $\pm 0.0$ ) (only known form)                                          |
| p-hydroxybenzoic acid (JOZZIH, self-env.) conformation 2                     | -495.6608 (-496.0808)         | $\pm 0.0$ ( $\pm 0.0$ ) (only known form)                                      |
| Piracetam in co-crystal piracetam:p-hydroxy-benzoic acid, DAVPEW             | -494.2687 (-494.6861)         | -0.69 (-0.56) (wrt. form III)                                                  |
| p-hydroxy-benzoic acid in DAVPEW co-crystal piracetam:p-hydroxy-benzoic acid | -495.6599 (-496.0798)         | +0.56 (+0.63) (wrt. lower energy conformation APFD /above conformations B3LYP) |
| Piracetam:p-hydroxy-benzoic acid co-crystal, ASU energy for both molecules   | -989.9391 (-990.7759)         | -6.71 (-6.21) (wrt. sum of components in their self-env.)                      |
| Gentisic acid (BESKAL04, self-env.)                                          | -570.8391 (-571.3127)         | $\pm 0.0$ ( $\pm 0.0$ )                                                        |
| Piracetam in co-crystal piracetam:gentisic acid, DAVPAS molecule 1           | -494.2705 (-494.6877)         | -1.82 (-1.57) wrt. BISMEV12                                                    |
| gentisic acid in co-crystal piracetam:gentisic acid, DAVPAS molecule 2       | -570.8368 (-571.3104)         | +1.44 (+1.44)                                                                  |
| Piracetam:gentisic acid co-crystal DAVPAS, ASU energy for both molecules     | -1065.1179 (-1066.0083)       | -7.03 (-6.53) (wrt. sum of components in self-environment)                     |

We emphasize that the sum of the ONIOM high-layer energies of the individual molecules is not the same as the energy of the high-layer energy of the combined ASU content. There is thus a pronounced energy gain for ASU dimer formation in these classical hydrogen-bonded systems. As one can see from adding the values given in Table 1 for piracetam and gentisic acid in the co-crystal and subtracting this sum from the energy of both molecules in a bigger cluster generated from the entire ASU content of that structure, this energy gain for the ASU dimer in the cluster of the co-crystal environment is considerable. The same is found for the piracetam p-hydroxybenzoic acid system. Since dimers (in their co-crystal pocket) are considerably more stable than the monomers in their respective self- or co-crystal environment, this finding identifies the main driving force of co-crystal formation from these examples.

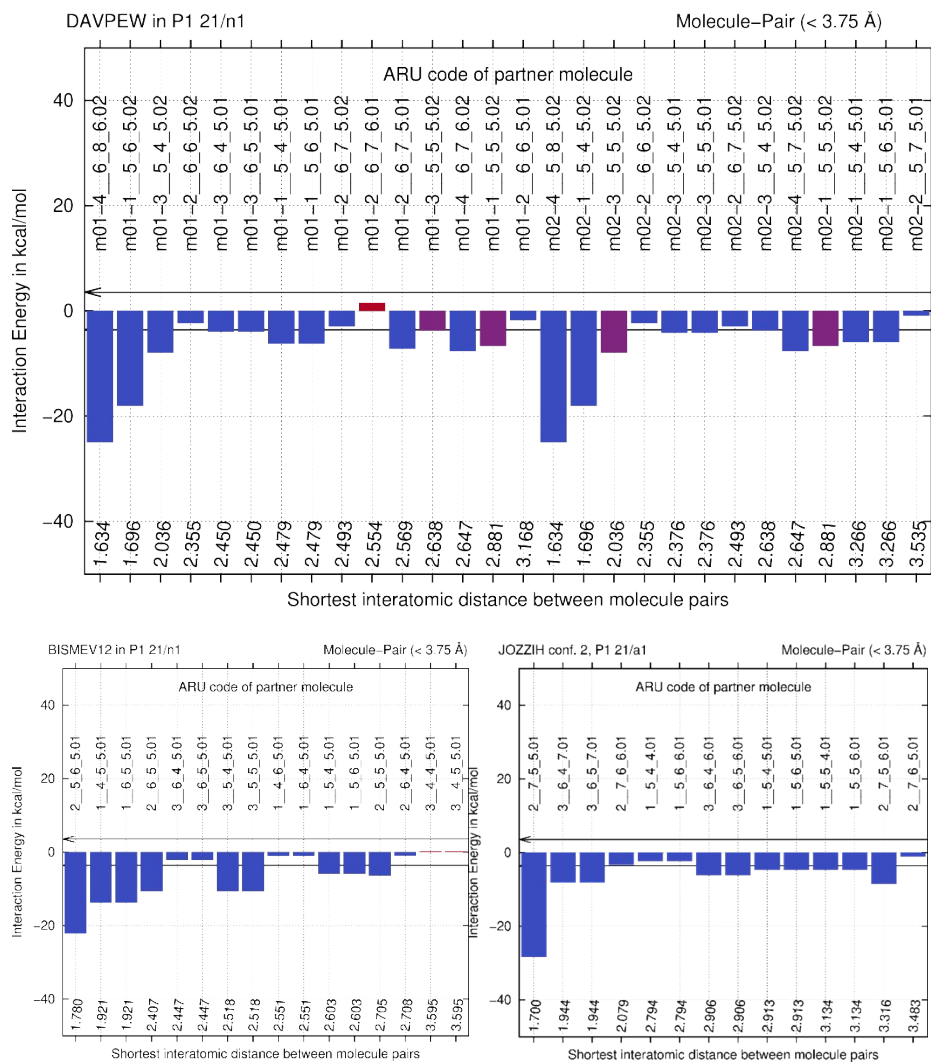

**Supplementary Figure 1** E(MPIE) analysis of molecule-pair interaction energies in crystal structure with CCDC recode DAVPAS compared to BISMEV12 and JOZZIH conformer 2, showing that the sum of the strongest interactions occurs between coformer and API, and not between API-API or coformer-coformers.

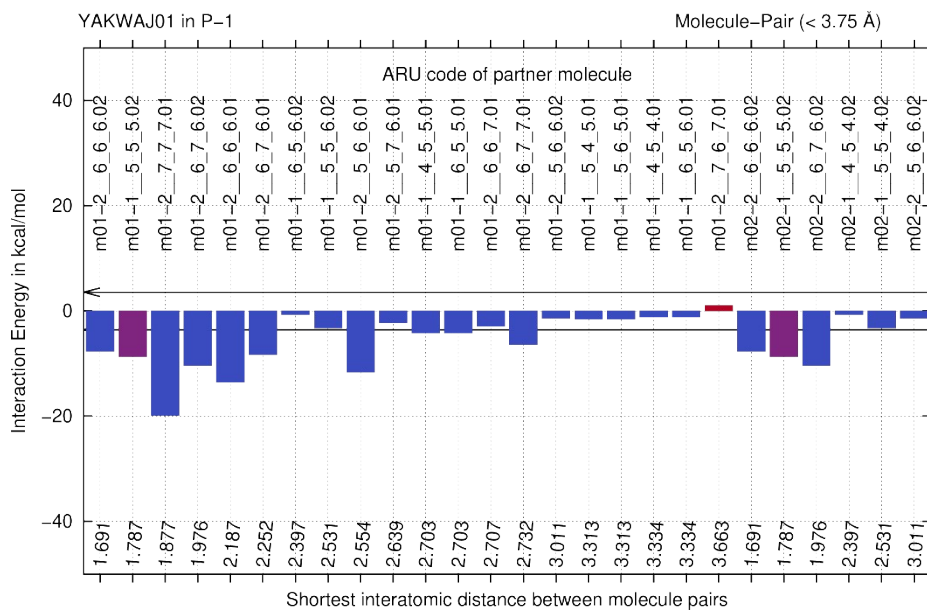

**Supplementary Figure 2** E(MPIE) analysis of molecule-pair interaction energies in hydrate crystal structure with CCDC refcode YAKWAJ01 compared to BISMEV12 (see above). A difference between hydrates and cocrystal structures is that for hydrates the strongest interactions occur between API and API, and not between API and water. Seen from the perspective of the water molecule, the statement still holds: The important interactions for the water m02 are all with molecules with ARU code ending with .02 and not with itself, molecules ending with .01.

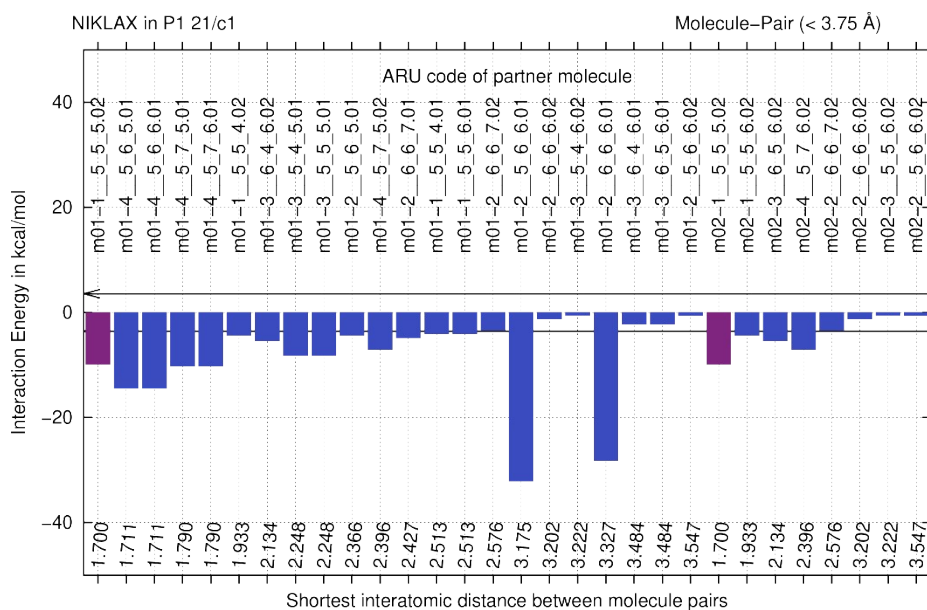

**Supplementary Figure 3** E(MPIE) analysis of molecule-pair interaction energies in hydrate crystal structure with CCDC refcode YAKWAJ01 compared to BISMEV12 (see above). A difference between hydrates and cocrystal structures is that for hydrates the strongest interactions occur between API and API, and not between API and water. Seen from the perspective of the water molecule, the statement still holds: The important interactions for the water m02 are all with molecules with ARU code ending with .02 and not with itself, molecules ending with .01.

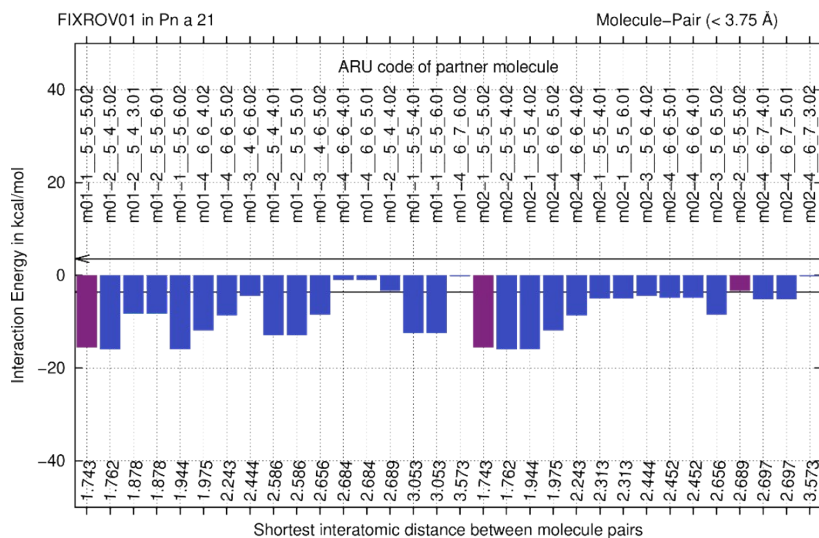

**Supplementary Figure 4** E(MPIE) analysis of molecule-pair interaction energies in crystal structure with CCDC refcode FIXROV01 compared to BISMEV12 and NIKLAX (for both see above), showing that the sum of the strongest interactions occurs between coformer and API, and not between API-API or coformer-coformer.

Energies in supplementary Table 2 are provided in a similar manner to the piracetam systems in supplementary Table 1, starting with self-environments on ONIOM partitioned energies for saccharin and piroxicam. Followed by these values are the energies of the molecules and the whole ASU content in the co-crystal.

**Table 2** ONIOM partitioned molecular energies and energy differences  $\Delta E$  of piroxicam/saccharin co-crystal dimers in the cluster compared to the sum of energies of saccharin and piroxicam in the self-environment. ONIOM MO/MO computations used the APFD/6-31G(d,p): APFD/3-21G (or, in brackets B3LYP/6-31G(d,p)/B3LYP/3-21G) functionals that include dispersion correction.

| Structure (REFCODE)                                                                                            | High-layer Energy in Hartrees | $\Delta E$ (kcal/mol) to lowest energy self-env.           |
|----------------------------------------------------------------------------------------------------------------|-------------------------------|------------------------------------------------------------|
| Saccharin (SCCHRNO7, self-environment)                                                                         | -947.7780 (-948.3461)         | $\pm 0.0$ ( $\pm 0.0$ )                                    |
| Piroxicam (BIYSEH11, form III self-env.)                                                                       | -1441.8221 (-1442.8206)       | $\pm 0.0$ ( $\pm 0.0$ )                                    |
| Piroxicam (BIYSEH14, form I self-env.)                                                                         | -1441.8213 (-1442.8198)       | +0.50 (+0.50) (wrt. form III)                              |
| Piroxicam (BIYSEH13, form I self-env.)                                                                         | -1441.8216 (-1442.8198)       | +0.19 (+0.50) (wrt. form III)                              |
| Piroxicam (BIYSEH12, form IV mol. 1, zwitterion self-env.)                                                     | -1441.8018 (-1442.7998)       | +12.74 (+13.05) (wrt. form III)                            |
| Piroxicam (BIYSEH12, form IV mol 2, uncharged self-env.)                                                       | -1441.8169 (-1442.8157)       | +3.26 (+3.07) (wrt. form III)                              |
| Piroxicam (BIYSEH12, form IV mol 3, uncharged self-env.)                                                       | -1441.8177 (-1442.8161)       | +2.76 (+2.82) (wrt. form III)                              |
| Piroxicam (BIYSEH12, form IV mol 4, uncharged self-env.)                                                       | -1441.8199 (-1442.8186)       | +1.38 (+1.26) (wrt. form III)                              |
| Piroxicam (BIYSEH12, form IV mol 5, uncharged self-env.)                                                       | -1441.8177(-1442.8158)        | +2.76 (+3.01) (wrt. form III)                              |
| Saccharin in piroxicam:saccharin co-crystal YANNEH01                                                           | -947.7766 (-948.3446)         | +0.88 (+0.94) (wrt. SCCHRNO7)                              |
| Piroxicam in piroxicam:saccharin co-crystal (zwitterion) YANNEH01                                              | -1441.8003 (-1442.7990)       | +13.68 (+13.55) (wrt. form III)                            |
| Piroxicam:saccharin co-crystal, ASU energy for both molecules (YANNEH01)                                       | -2389.5831 (-2391.1750)       | -10.67 (-5.21) (wrt. sum of components in their self-env.) |
| Piroxicam:saccharin co-crystal, ASU energy for both molecules, "different" dimer (relative saccharin position) | -2389.5845 (-2391.1748)       | -9.79 (-5.08) (wrt. sum of components in their self-env.)  |

**Table 3** ONIOM partitioned molecular and dimer energies of aspirin co-crystals with theophylline and saccharin in the cluster compared to the energy of the constituents in their self-environments. ONIOM MO/MO computations used the method/basis set combination APFD/6-31G(d,p): APFD/3-21G (or, in brackets B3LYP/6-31G(d,p)/B3LYP/3-21G) with dispersion correction.

| <b>Structure (REFCODE or internal code, omitted if new structure reported here)</b> | <b>High layer energy in Hartrees</b> | <b>Energy difference (in kcal/mol) to lowest energy self-env.</b> |
|-------------------------------------------------------------------------------------|--------------------------------------|-------------------------------------------------------------------|
| Saccharin (SCCHR07, self-environment)                                               | -947.7780 (-948.3461)                | ±0.0 (±0.0)                                                       |
| Theophylline form I (BAPLOT05, self-env.)                                           | -640.5770 (-641.1115)                | ±0.0 (±0.0)                                                       |
| Theophylline form II (BAPLOT06, self-env.)                                          | -640.5759 (-641.1105)                | +0.69 (+0.63)                                                     |
| Theophylline form IV molecule 1 (BAPLOT03, self-env.)                               | -640.5767 (-641.1112)                | +0.19 (+0.19)                                                     |
| Theophylline form IV molecule 2 (BAPLOT03, self-env.)                               | -640.5764 (-641.1110)                | +0.38 (+0.31)                                                     |
| Aspirin polymorph I, (ACSALA14, self-env.)                                          | -648.1957 (-648.7427)                | -0.03 (+0.06)                                                     |
| Aspirin polymorph II, (ACSALA15, self-env.)                                         | -648.1947 (-648.7417)                | +0.60 (+0.69)                                                     |
| Aspirin pol. III, mol. 1 (ACSALA24, self-env.)                                      | -648.1963 (-648.7435)                | ±0.0 (±0.0) (average of both molecules, -648.19565 (-648.7428))   |
| Aspirin pol. III, mol. 2 (ACSALA24, self-env.)                                      | -648.1950 (-648.7421)                | ±0.0 (±0.0) (average of both molecules)                           |
| Theophylline in aspirin:theophylline DIPJQA co-crystal                              | -640.5760 (-641.1106)                | +0.63 (+0.56)                                                     |
| Aspirin in aspirin:theophylline DIPJQA co-crystal                                   | -648.1977 (-648.7446)                | -1.29 (-1.13)                                                     |
| Theophylline in theophylline:saccharin XOBGUN co-crystal                            | -640.5773 (-641.1119)                | -0.19 (-0.25) wrt. BAPLOT05                                       |
| Saccharin in XOBGUN theophylline:saccharin co-crystal                               | -947.7791 (-948.3472)                | -0.69 (-0.69) wrt. SCCHR07                                        |
| Aspirin:theophylline DIPJQA co-crystal, ASU energy for both molecules               | -1288.8156 (-1289.8967)              | -26.95 (-26.60)                                                   |
| Theophylline:saccharin XOBGUN co-crystal, ASU energy for both molecules             | -1588.3920 (-1589.4947)              | -23.22 (-23.28)                                                   |

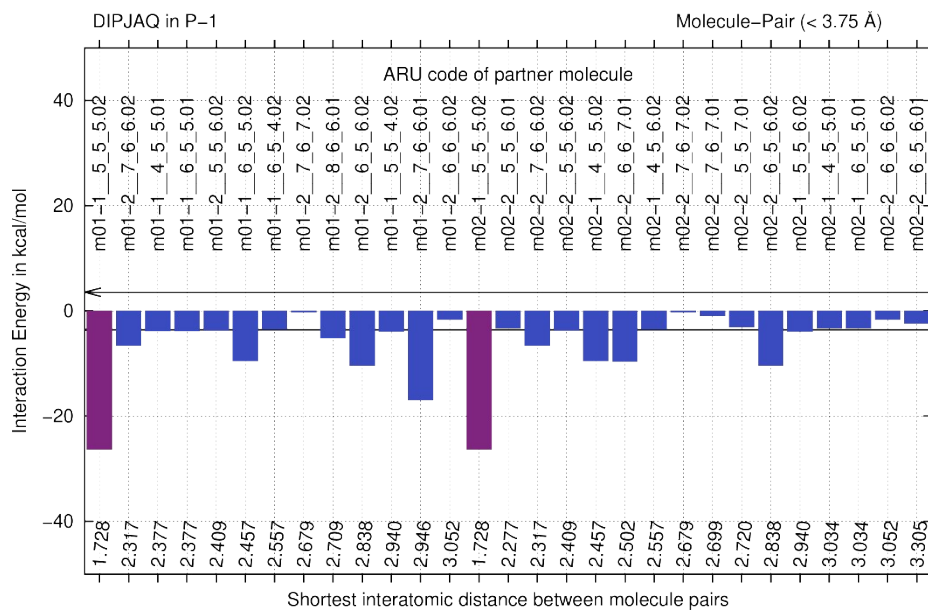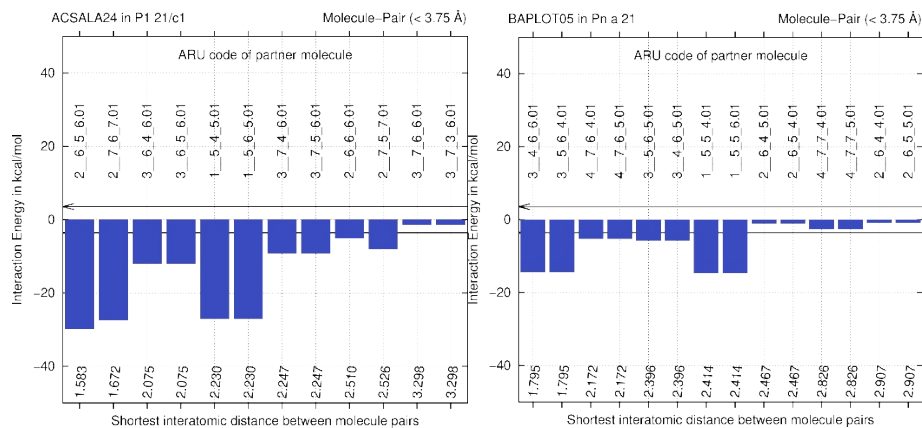

**Supplementary Figure 5** E(MPIE) analysis of molecule-pair interaction energies in crystal structure with CCDC refcode DIPJAQ compared to ACSALA24 and BAPLOT05, showing that the sum of the strongest interactions occurs between cofomer and API, and not between API-API or cofomer-cofomer.

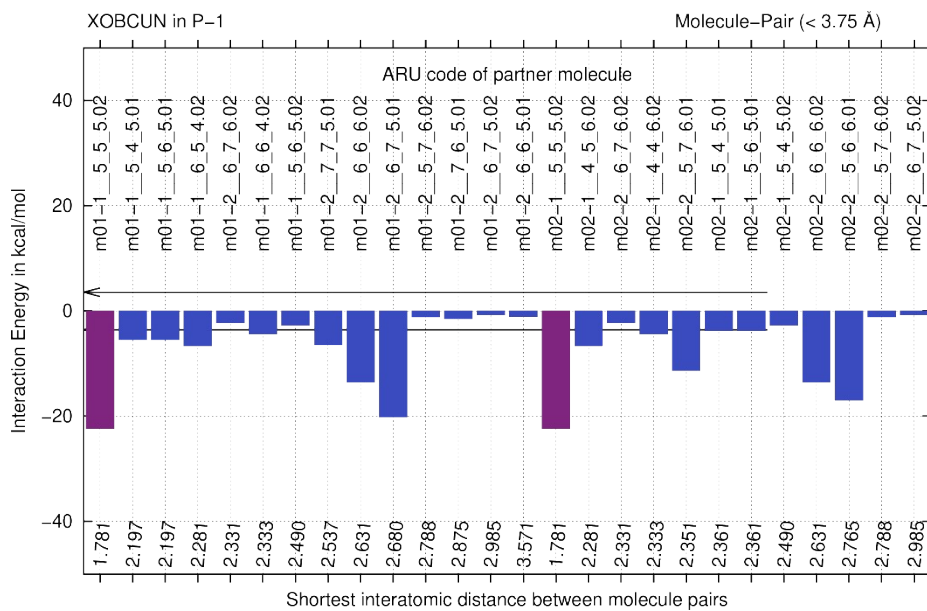

**Supplementary Figure 6** E(MPIE) analysis of molecule-pair interaction energies in crystal structure with CCDC refile XOBCUN compared to BAPLOT05 and SCCHR07 (for the latter two plots, see above), showing that the sum of the strongest interactions occurs between coformer and API, and not between API-API or coformer-coformer.

**Table 5** VASP full solid-state optimizations and lattice energies of all co-crystal, API and coformer structures relevant for the discussion. VASP was used with a PBE/D3 DFT functional with dispersion correction.

| REFCODE  | E(kcal/mol/atom)    | No. of ASU atoms | SG      | a       | b        | c        | alpha    | beta     | gamma    |
|----------|---------------------|------------------|---------|---------|----------|----------|----------|----------|----------|
| ACSALA14 | -153.12880321498957 | 21               | P2_1/c  | 11.3305 | 6.54974  | 11.40309 | 90       | 96.26319 | 90       |
| ACSALA15 | -153.1294371958214  | 21               | P2_1/c  | 12.1479 | 6.45759  | 11.46211 | 90       | 111.2822 | 90       |
| ACSALA24 | -153.05669178246504 | 42               | P2_1/c  | 16.7668 | 4.78073  | 23.51771 | 90       | 111.1324 | 90       |
| BAPLOT03 | -155.65367293047609 | 42               | P2_1/c  | 7.80708 | 12.9698  | 15.90172 | 90       | 104.3773 | 90       |
| BAPLOT05 | -155.60731505069924 | 21               | Pna2_1  | 12.9672 | 15.6997  | 3.933330 | 90       | 90       | 90       |
| BAPLOT06 | -155.64727435688874 | 21               | Pna2_1  | 23.9811 | 3.86943  | 8.450861 | 90       | 90       | 90       |
| BESKAL04 | -154.89394473180019 | 17               | P2_1/n  | 5.70242 | 4.80477  | 23.45583 | 90       | 92.49646 | 90       |
| BISMEV11 | -142.59552002780268 | 20               | P-1     | 6.42322 | 6.56040  | 8.331441 | 81.10020 | 78.39854 | 90.08167 |
| BISMEV12 | -142.5944469611448  | 20               | P2_1/n  | 6.49746 | 6.43051  | 16.12559 | 90       | 91.84614 | 90       |
| BIYSEH11 | -154.0250766708312  | 36               | P-1     | 7.80935 | 10.1496  | 10.44595 | 80.74681 | 71.10988 | 69.83255 |
| BIYSEH12 | -154.03846252259012 | 180              | P-1     | 12.7411 | 14.7228  | 20.58969 | 85.08347 | 74.41714 | 85.17456 |
| BIYSEH13 | -154.02158425100254 | 36               | P2_1/c  | 7.08794 | 15.0850  | 13.92085 | 90       | 96.37619 | 90       |
| DAVPAS   | -148.31768763241371 | 37               | C_2/c   | 27.9113 | 5.12818  | 19.73289 | 90       | 102.0103 | 90       |
| DAVPEW   | -148.01240383056719 | 36               | P_2_1/n | 14.3887 | 5.54070  | 17.38268 | 90       | 108.8243 | 90       |
| DIPJAJ   | -154.37940768086793 | 42               | P-1     | 7.01732 | 10.1419  | 12.04756 | 104.7154 | 94.36336 | 102.6399 |
| FIXROV01 | -153.30333249781765 | 53               | Pna2_1  | 22.9257 | 11.7721  | 7.105886 | 90       | 90       | 90       |
| JOZZIH2  | -154.58510678049029 | 16               | P2_1/a  | 19.5110 | 4.99825  | 6.203123 | 90       | 92.19963 | 90       |
| NIKLAH   | -156.009472471881   | 36               | P2_1/c  | 6.78099 | 14.6894  | 13.18371 | 90       | 97.81751 | 90       |
| SCCHR07  | -155.75127033055682 | 17               | P2_1/c  | 9.43281 | 6.85886  | 12.05615 | 90       | 104.1877 | 90       |
| XOBCUN   | -155.71281774247359 | 38               | P-1     | 8.55875 | 8.80041  | 11.71180 | 73.18451 | 75.11128 | 65.99831 |
| YANNEH01 | -154.6689012        | 53               | P-1     | 9.63080 | 10.43135 | 12.68418 | 66.97746 | 71.22074 | 89.03942 |
| YAKWAJ01 | -138.97837065329423 | 23               | P-1     | 7.07338 | 7.27280  | 9.126904 | 97.28905 | 102.7984 | 117.4717 |
